# Supplementary material for: First real-world time-travel experiment shows ecosystem collapse due to climate change
Source: Research Square preprint supplement (doi:10.21203/rs.3.rs-3353228/v1), 2023-10-12
Supplement: Supplementary file 1 [file 8863b48dea654a64dee79de7.xlsx]

## Sheet: Sheet1
Supplementary data 1
CRMS Site	Longitude (RWL)	Latitude (RWL)	Rate of RWL change (mm/yr)	95% confidence interval (mm/yr)	Correlation coefficient with GSL change at Grand Isle	Annual mean tidal amplitude (m)	Longitude (SEC)	Latitude (SEC)	Mean rate of VLM-corrected RWL change with Monte Carlo simulation (mm/yr)	Standard devation (mm/yr)	Mean rate of SEC with Monte Carlo simulation (mm/yr)	Standard devation (mm/yr)	Elevation deficit (RWL change minus SEC, mm/yr)	Pleistocene depth below land surface (m)	Rod installation depth below land surface (m)	Mean organic-matter content (top 24 cm)	Classification (low tide)	Classification (mean tide)	Classification (high tide)
2	-89.7916	30.1003	14.4803	4.398	0.822889	0.0699728	-89.7918	30.1004	12.0129	1.92386	4.81548	0.448861	7.19738	10.1164	19.2329	0.232939	Give-up (drowning in progress)	Give-up (drowning in progress)	Give-up (drowning in progress)
3	-89.252	30.0999	11.4931	3.49584	0.875508	0.274441	-89.2527	30.0994	8.99663	1.656	4.9863	0.828296	4.01032	17.0191	19.0652	NaN	Give-up (drowning projected)	Give-up (drowning in progress)	Give-up (drowning in progress)
6	-89.9823	30.2636	13.9372	4.83648	0.686653	0.0310446	-89.9822	30.2635	13.9537	1.70935	3.50721	0.550669	10.4465	1.92096	17.9131	0.305817	Give-up (drowning in progress)	Give-up (drowning complete)	Give-up (drowning complete)
30	-90.3251	30.304	17.9646	4.36677	0.800607	0.0610682	-90.3254	30.3039	15.4624	2.05943	6.45675	0.875279	9.00566	19.2454	22.9758	0.282867	Give-up (drowning in progress)	Give-up (drowning in progress)	Give-up (drowning in progress)
34	-90.3887	30.3056	15.7727	4.92262	0.770014	0.0433657	-90.3886	30.3054	13.2853	2.18171	8.06517	1.13151	5.22013	11.5266	20.7843	0.538778	Give-up (drowning in progress)	Give-up (drowning in progress)	Give-up (drowning in progress)
38	-90.6775	30.2135	16.6713	6.09314	0.7142	0.0419906	-90.6775	30.2134	16.6749	2.46058	6.548	0.488149	10.1269	0.557056	14.6304	NaN	Give-up (drowning complete)	Give-up (drowning complete)	Give-up (drowning complete)
46	-90.4973	30.4056	19.0397	6.30024	0.713256	0.0481987	-90.4976	30.4058	19.0473	2.34449	9.66875	0.294903	9.37859	1.54546	14.3469	NaN	Give-up (drowning in progress)	Give-up (drowning in progress)	Give-up (drowning in progress)
86	-89.6356	30.3146	21.7773	10.2993	0.520018	0.227514	-89.6355	30.3144	21.794	3.88013	3.99749	0.72111	17.7965	-0.99939	16.9987	NaN	Give-up (drowning in progress)	Give-up (drowning in progress)	Give-up (drowning complete)
97	-90.6593	30.1543	16.9923	6.24033	0.693994	0.0401834	-90.6595	30.1547	16.9912	2.5498	2.14535	1.11836	14.8458	2.64513	12.192	NaN	Give-up (drowning in progress)	Give-up (drowning in progress)	Give-up (drowning in progress)
103	-90.2593	30.3961	16.5786	6.26971	0.733123	0.0518485	-90.2594	30.396	16.6165	2.47814	8.20627	0.676677	8.41022	1.47197	14.5603	NaN	Give-up (drowning in progress)	Give-up (drowning in progress)	Give-up (drowning in progress)
108	-89.4119	29.9528	13.0586	3.53445	0.846396	0.255603	-89.4119	29.953	10.5587	1.68605	7.81062	0.334036	2.74811	23.6735	26.8224	NaN	Give-up (drowning projected)	Give-up (drowning in progress)	Give-up (drowning in progress)
118	-89.5421	29.3785	28.1815	8.51054	0.611647	0.164303	-89.5425	29.378	25.6829	2.31799	11.832	0.837512	13.8509	56.9183	26.353	NaN	Give-up (drowning in progress)	Give-up (drowning in progress)	Give-up (drowning in progress)
120	-89.8565	29.8445	7.1475	4.84158	0.406394	0.00498121	-89.8563	29.8445	4.62781	1.87131	-2.54767	2.22999	7.17547	30.6859	24.142	0.451594	Give-up (drowning in progress)	Give-up (drowning in progress)	Give-up (drowning in progress)
125	-89.981	29.7662	16.2255	4.00472	0.713598	0.00968976	-89.9812	29.7659	13.7015	1.7699	-0.00639414	0.890744	13.7079	29.1393	26.4584	0.481656	Give-up (drowning in progress)	Give-up (drowning in progress)	Give-up (drowning in progress)
129	-89.6026	29.4688	14.0519	3.67111	0.804416	0.209479	-89.6033	29.4687	11.5175	1.74693	4.8352	0.322508	6.6823	47.7555	36.3565	0.173994	Give-up (drowning in progress)	Give-up (drowning in progress)	Give-up (drowning in progress)
131	-89.8888	29.6883	17.4242	4.56651	0.837245	0.0735799	-89.8887	29.6885	14.9065	2.03081	-1.10949	1.01773	16.016	33.8339	17.9192	0.192006	Give-up (drowning in progress)	Give-up (drowning in progress)	Give-up (drowning in progress)
132	-89.8848	29.6642	14.7067	4.20865	0.829986	0.0699649	-89.8856	29.6639	12.1957	1.94904	1.70846	1.14749	10.4872	32.5144	23.0856	0.391683	Give-up (drowning in progress)	Give-up (drowning in progress)	Give-up (drowning in progress)
135	-89.761	29.6864	16.0278	4.15252	0.80266	0.120239	-89.7604	29.6866	13.5419	1.95677	-0.67446	0.478957	14.2164	46.433	18.0624	0.211439	Give-up (drowning projected)	Give-up (drowning projected)	Give-up (drowning in progress)
136	-89.7913	29.621	15.7014	4.11335	0.826618	0.172119	-89.7918	29.6212	13.1857	1.90084	6.30259	0.687848	6.88307	41.3161	25.4538	0.19175	Give-up (drowning projected)	Give-up (drowning in progress)	Give-up (drowning in progress)
139	-89.478	29.3828	27.0804	7.57648	0.664212	0.220042	-89.4792	29.3826	24.5817	2.54096	15.6074	1.17894	8.97435	58.5676	24.0335	NaN	Give-up (drowning in progress)	Give-up (drowning in progress)	Give-up (drowning in progress)
146	-89.7266	29.729	14.4718	4.10035	0.845942	0.116758	-89.7261	29.7291	11.991	2.05211	6.54583	0.954032	5.44516	41.4732	21.6804	0.223194	Give-up (drowning in progress)	Give-up (drowning in progress)	Give-up (drowning in progress)
147	-89.6047	29.6655	14.7832	4.1681	0.793764	0.267564	-89.6041	29.6657	12.2603	1.87307	4.15407	0.358668	8.10621	43.4919	21.5036	NaN	Give-up (drowning projected)	Give-up (drowning in progress)	Give-up (drowning in progress)
148	-89.6975	29.5125	45.8739	13.1345	0.58312	0.201435	-89.6979	29.5123	43.3588	2.9602	10.0934	1.15343	33.2655	47.1533	32.577	0.132511	Give-up (drowning in progress)	Give-up (drowning in progress)	Give-up (drowning in progress)
154	-89.2	29.116	40.8295	6.01289	0.679888	0.185375	-89.2	29.115	38.3345	1.83459	25.6845	1.384	12.65	97.594	26.6138	0.156678	Give-up (drowning in progress)	Give-up (drowning in progress)	Give-up (drowning in progress)
156	-89.1699	29.1622	38.3516	6.27716	0.701024	0.184744	-89.17	29.1623	35.8185	1.98781	30.2909	1.34683	5.52764	93.1364	24.1341	0.0836667	Give-up (drowning in progress)	Give-up (drowning in progress)	Give-up (drowning in progress)
157	-89.2263	29.1318	36.0975	10.6972	0.528178	0.158497	-89.227	29.1312	33.6152	2.48771	13.0408	1.28615	20.5744	96.1616	24.1176	0.0949667	Give-up (drowning in progress)	Give-up (drowning in progress)	Give-up (drowning in progress)
159	-89.199	29.0378	29.3388	3.21807	0.825763	0.233761	-89.1991	29.0379	26.8272	1.42044	7.07673	1.1244	19.7504	113.939	24.0548	0.0892944	Give-up (drowning in progress)	Give-up (drowning in progress)	Give-up (drowning complete)
161	-89.1667	29.2937	27.8262	3.63789	0.799614	0.219583	-89.1667	29.2938	25.3207	1.56625	12.0042	4.93842	13.3165	82.4921	25.2954	0.180367	Give-up (drowning complete)	Give-up (drowning complete)	Give-up (drowning complete)
163	-89.4211	29.2167	18.8922	3.83728	0.828419	0.199336	-89.4208	29.2167	16.3568	1.4127	10.0814	1.05943	6.27534	86.5624	25.3868	0.126094	Give-up (drowning in progress)	Give-up (drowning in progress)	Give-up (drowning in progress)
164	-90.1707	29.1944	13.6541	3.58187	0.92554	0.180507	-90.1699	29.1939	11.1593	1.55561	11.1664	0.932427	-0.00711438	52.4409	27.6606	0.35165	Keep-up (dynamic equilibrium)	Keep-up (dynamic equilibrium)	Keep-up (dynamic equilibrium)
171	-89.7947	29.3231	15.1491	3.18531	0.822279	0.233398	-89.795	29.3237	12.6233	1.44354	9.32686	0.567929	3.29644	56.7669	29.7302	0.109778	Give-up (drowning in progress)	Give-up (drowning in progress)	Give-up (drowning in progress)
172	-89.7385	29.3145	14.2132	3.35037	0.874223	0.226889	-89.7386	29.314	11.6983	1.43083	9.41741	0.958789	2.28088	54.3956	32.1015	0.182656	Give-up (drowning in progress)	Give-up (drowning in progress)	Give-up (drowning complete)
173	-89.7304	29.4532	13.0361	3.10847	0.847547	0.215841	-89.731	29.4534	10.5221	1.43175	8.69766	0.572198	1.82444	44.9528	26.5603	0.325294	Give-up (drowning projected)	Give-up (drowning in progress)	Give-up (drowning in progress)
175	-90.1422	29.2901	11.0836	4.80455	0.810632	0.178249	-90.142	29.2893	8.57551	1.7797	9.84649	0.621116	-1.27098	54.872	21.1343	0.251589	Speed-up	Catch-up	Catch-up
178	-90.0458	29.2878	14.1886	3.77965	0.917161	0.203959	-90.0458	29.2874	11.6618	1.64107	11.107	0.999153	0.554771	55.5701	21.1343	0.134128	Keep-up (stable equilibrium)	Keep-up (dynamic equilibrium)	Keep-up (dynamic equilibrium)
179	-89.6983	29.3961	13.8412	3.75727	0.877147	0.238018	-89.6984	29.3962	11.3523	1.57588	8.54093	1.19561	2.81136	47.5791	25.4417	0.1441	Give-up (drowning projected)	Give-up (drowning in progress)	Give-up (drowning in progress)
181	-89.6971	29.3347	14.4152	3.91692	0.74154	0.235226	-89.6963	29.3355	11.9201	1.56185	14.4967	0.977739	-2.57656	52.421	31.5346	0.163522	Speed-up	Speed-up	Catch-up
209	-89.7912	29.4901	22.5076	4.82829	0.796086	0.19772	-89.7917	29.4906	19.9888	1.69176	6.39073	0.903232	13.5981	42.8849	27.7002	0.360044	Give-up (drowning projected)	Give-up (drowning in progress)	Give-up (drowning in progress)
217	-90.8773	29.9166	11.83	15.5721	0.350246	0.00232386	-90.8779	29.9164	9.30019	4.09629	6.66635	0.716551	2.63384	35.0103	23.9359	NaN	Give-up (drowning in progress)	Give-up (drowning in progress)	Give-up (drowning in progress)
220	-90.0687	29.5655	12.1722	4.08041	0.886864	0.102632	-90.0687	29.5648	9.65312	1.97777	1.99193	1.43447	7.66119	40.3802	24.3535	0.389567	Give-up (drowning in progress)	Give-up (drowning in progress)	Give-up (drowning in progress)
224	-89.917	29.5003	12.9305	2.91253	0.831031	0.145651	-89.9177	29.4996	10.4139	1.36217	6.24967	0.663127	4.16421	41.9775	21.7627	0.284483	Give-up (drowning in progress)	Give-up (drowning in progress)	Give-up (drowning in progress)
225	-90.0085	29.5627	14.0443	3.72913	0.874287	0.10503	-90.0095	29.5631	11.5188	1.58653	9.16328	0.799097	2.35551	39.237	26.4201	0.3841	Give-up (drowning in progress)	Give-up (drowning in progress)	Give-up (drowning in progress)
226	-89.8849	29.5126	13.4138	4.03354	0.854603	0.166597	-89.8854	29.5123	10.891	1.6323	7.83963	0.568876	3.05139	41.0436	26.1884	0.288944	Give-up (drowning projected)	Give-up (drowning in progress)	Give-up (drowning in progress)
232	-90.0125	29.4977	14.6608	3.86388	0.856325	0.151053	-90.0125	29.4979	12.1373	1.60826	8.11219	0.545904	4.02513	42.1775	26.5999	0.21295	Give-up (drowning in progress)	Give-up (drowning in progress)	Give-up (drowning in progress)
248	-90.0708	29.6026	14.4747	4.46099	0.860601	0.0620414	-90.0709	29.6021	11.9616	1.68878	6.92774	0.580119	5.0339	39.3167	30.1722	0.399922	Give-up (drowning in progress)	Give-up (drowning in progress)	Give-up (drowning in progress)
251	-90.0114	29.5186	13.4405	3.30575	0.868313	0.128921	-90.0105	29.5187	10.9438	1.50169	5.47285	0.666086	5.471	41.1363	21.8176	0.270422	Give-up (drowning in progress)	Give-up (drowning in progress)	Give-up (drowning complete)
253	-90.0734	29.5552	13.9468	3.90576	0.855281	0.100742	-90.073	29.555	11.4389	1.58734	2.5366	0.987354	8.90228	40.7996	25.3959	0.284744	Give-up (drowning in progress)	Give-up (drowning in progress)	Give-up (drowning in progress)
258	-89.8197	29.524	15.7724	3.56502	0.847042	0.119577	-89.82	29.524	13.2593	1.5272	-18.3786	4.37395	31.6379	41.0094	24.0548	0.3246	Give-up (drowning in progress)	Give-up (drowning in progress)	Give-up (drowning in progress)
260	-89.8544	29.5343	12.3956	3.9702	0.874838	0.120599	-89.8543	29.5341	9.88303	1.6	10.1921	1.55458	-0.30904	39.8599	25.0088	0.445922	Keep-up (dynamic equilibrium)	Keep-up (dynamic equilibrium)	Keep-up (dynamic equilibrium)
261	-90.1047	29.602	14.5731	4.40168	0.868579	0.0788807	-90.1043	29.6021	12.0438	1.73036	8.77654	0.635693	3.26723	38.743	30.1447	0.422372	Give-up (drowning in progress)	Give-up (drowning in progress)	Give-up (drowning in progress)
263	-89.8892	29.5529	13.9449	3.91181	0.853633	0.117647	-89.8888	29.5533	11.4245	1.56634	-4.66336	0.966434	16.0879	38.4217	20.4429	0.339789	Give-up (drowning in progress)	Give-up (drowning in progress)	Give-up (drowning in progress)
272	-89.6929	29.42	13.4678	3.20928	0.868497	0.228371	-89.6938	29.4207	10.9543	1.4529	10.5529	1.03488	0.401434	46.4173	31.6047	0.213939	Keep-up (stable equilibrium)	Keep-up (dynamic equilibrium)	Keep-up (dynamic equilibrium)
276	-89.9448	29.6195	14.5216	3.37504	0.830595	0.0746854	-89.9451	29.6193	12.0251	1.51867	8.26114	1.171	3.76393	34.6747	26.5328	0.398939	Give-up (drowning in progress)	Give-up (drowning in progress)	Give-up (drowning in progress)
282	-89.7603	29.4988	13.9225	3.54899	0.817277	0.152959	-89.7613	29.4986	11.4163	1.59826	2.395	0.868434	9.02125	43.2512	21.7678	0.454033	Give-up (drowning in progress)	Give-up (drowning in progress)	Give-up (drowning in progress)
292	-90.2287	29.1414	11.1564	3.56824	0.909079	0.252927	-90.2281	29.1412	8.63533	1.4786	10.8503	0.74262	-2.21495	49.0577	24.195	0.142528	Speed-up	Speed-up	Catch-up
293	-91.2013	29.2399	12.8625	4.28222	0.886704	0.138143	-91.2011	29.2402	10.3592	1.5605	4.69138	0.379427	5.66778	45.5482	23.0673	0.17995	Give-up (drowning in progress)	Give-up (drowning in progress)	Give-up (drowning in progress)
303	-91.069	29.2412	9.99184	5.57095	0.735878	0.249857	-91.069	29.241	7.4862	1.89519	4.26089	0.564266	3.22531	39.6539	12.192	0.152356	Give-up (drowning projected)	Give-up (drowning projected)	Give-up (drowning in progress)
305	-91.1981	29.3895	13.1824	4.60572	0.760643	0.247051	-91.198	29.3889	10.6816	1.58893	12.8896	0.540971	-2.20799	38.6588	23.1648	0.244061	Speed-up	Speed-up	Speed-up
307	-90.827	29.2534	12.8445	3.63957	0.906905	0.215227	-90.8271	29.2538	10.332	1.46529	8.31387	0.879469	2.01811	57.5233	33.5981	0.286833	Give-up (drowning in progress)	Give-up (drowning in progress)	Give-up (drowning in progress)
309	-91.1961	29.2534	12.1662	5.2243	0.756091	0.220273	-91.1959	29.2537	9.6434	1.70572	11.4413	1.45759	-1.79786	45.1761	26.5725	0.144417	Speed-up	Speed-up	Speed-up
310	-90.2932	29.2949	11.4214	3.98103	0.864188	0.21934	-90.2933	29.2945	8.92035	1.51892	12.9404	0.793783	-4.02004	65.7758	31.6992	0.167711	Speed-up	Catch-up	Catch-up
311	-90.7923	29.2143	14.6397	3.82259	0.903624	0.220713	-90.7918	29.2148	12.1564	1.51	8.49819	0.650393	3.65823	48.3421	25.2405	0.239628	Give-up (drowning in progress)	Give-up (drowning in progress)	Give-up (drowning in progress)
315	-90.5718	29.4018	5.25572	8.57844	0.565176	0.217624	-90.5729	29.4027	2.74136	2.21737	-27.5771	5.24723	30.3185	64.1023	26.3913	0.526294	Give-up (drowning complete)	Give-up (drowning complete)	Give-up (drowning complete)
318	-90.3249	29.2943	10.8694	5.42817	0.705157	0.224323	-90.3255	29.2948	8.36026	1.82673	9.23853	0.652234	-0.878274	60.9594	31.6992	0.176622	Speed-up	Catch-up	Catch-up
319	-90.3257	29.3245	11.5225	4.21996	0.815238	0.191483	-90.3257	29.3236	9.03691	1.62177	12.5537	1.00464	-3.51681	53.4607	35.7848	0.197039	Speed-up	Catch-up	Catch-up
322	-91.1072	29.2447	11.6422	4.32385	0.916939	0.18556	-91.1066	29.2447	9.14847	1.60944	8.68515	0.540093	0.463317	41.5793	12.192	0.290789	Keep-up (stable equilibrium)	Keep-up (dynamic equilibrium)	Keep-up (dynamic equilibrium)
324	-91.2331	29.9906	19.2858	15.1282	0.500824	0.00899621	-91.2332	29.9908	16.7542	3.41926	13.5892	1.02968	3.16502	26.8398	29.2594	NaN	Give-up (drowning in progress)	Give-up (drowning in progress)	Give-up (drowning in progress)
326	-91.0745	29.2743	15.8578	4.07551	0.878159	0.187084	-91.074	29.2737	13.3578	1.50385	5.50139	0.348173	7.85645	40.8668	12.192	0.163089	Give-up (drowning projected)	Give-up (drowning in progress)	Give-up (drowning in progress)
332	-91.0392	29.2982	14.2388	4.29297	0.867213	0.203869	-91.0397	29.2982	11.735	1.56239	5.85049	0.807728	5.88452	42.0556	12.192	0.150622	Give-up (drowning projected)	Give-up (drowning projected)	Give-up (drowning in progress)
335	-90.3873	29.2637	17.7066	4.22666	0.735721	0.211703	-90.3868	29.2691	15.1308	2.65136	11.5214	0.836456	3.60941	51.9571	42.0045	0.156256	Give-up (drowning in progress)	Give-up (drowning in progress)	Give-up (drowning in progress)
336	-90.3832	29.3202	10.4612	3.88978	0.871601	0.242402	-90.3834	29.3199	7.92294	1.59044	9.39714	0.705683	-1.4742	53.6904	27.5417	0.300856	Speed-up	Speed-up	Catch-up
337	-90.3559	29.3114	12.7328	3.24044	0.854982	0.23575	-90.3551	29.3108	10.2317	1.50258	11.5411	1.39965	-1.30946	54.676	30.288	0.167122	Speed-up	Speed-up	Catch-up
338	-90.4148	29.3345	14.1266	3.50188	0.902541	0.239224	-90.415	29.3345	11.6356	1.53347	9.5063	1.10715	2.12928	55.2735	25.4282	0.202272	Give-up (drowning in progress)	Give-up (drowning in progress)	Give-up (drowning complete)
341	-90.5127	29.3094	10.7653	4.03872	0.81459	0.258937	-90.5122	29.3091	8.21242	1.6311	18.1245	1.61507	-9.91206	65.931	27.8801	0.187306	Speed-up	Catch-up	Catch-up
345	-90.7624	29.1705	15.6818	4.28831	0.830239	0.238836	-90.7623	29.1704	13.1873	1.57993	16.4759	1.22907	-3.28867	49.1169	28.0416	0.154756	Speed-up	Catch-up	Catch-up
347	-90.7007	29.1614	13.5713	3.36221	0.887129	0.226344	-90.7015	29.1622	11.0877	1.47654	-5.72015	3.16722	16.8079	60.6508	21.1343	0.150972	Give-up (drowning complete)	Give-up (drowning complete)	Give-up (drowning complete)
354	-91.0087	29.3319	13.3936	3.96358	0.862315	0.168379	-91.0095	29.3308	10.8714	1.63311	4.34998	1.35761	6.52144	41.3246	27.9258	0.345939	Give-up (drowning in progress)	Give-up (drowning in progress)	Give-up (drowning in progress)
369	-90.695	29.2946	12.0782	4.09494	0.894798	0.186543	-90.6949	29.2945	9.54842	1.60167	3.19799	0.454908	6.35043	59.1814	33.9273	0.23895	Give-up (drowning projected)	Give-up (drowning in progress)	Give-up (drowning in progress)
374	-90.7934	29.1565	12.4492	3.22232	0.878928	0.223965	-90.7928	29.1567	9.94275	1.44768	8.8251	0.526582	1.11765	47.6692	24.384	0.138272	Give-up (drowning in progress)	Give-up (drowning in progress)	Give-up (drowning in progress)
376	-90.8572	29.1236	12.91	4.6321	0.736164	0.268439	-90.8577	29.1241	10.4107	1.69368	-22.9537	0.635274	33.3644	62.4784	21.1343	0.105889	Give-up (drowning complete)	Give-up (drowning complete)	Give-up (drowning complete)
377	-91.0066	29.2325	11.888	3.6039	0.860857	0.256907	-91.0069	29.2321	9.407	1.51437	5.01088	0.530825	4.39612	43.4645	35.8536	0.153383	Give-up (drowning projected)	Give-up (drowning in progress)	Give-up (drowning in progress)
383	-90.9479	29.2078	12.6679	3.89561	0.864127	0.245397	-90.9489	29.2075	10.1614	1.54972	10.0225	0.480126	0.138955	72.6801	28.9499	0.187217	Keep-up (dynamic equilibrium)	Keep-up (dynamic equilibrium)	Keep-up (dynamic equilibrium)
386	-90.3551	29.4334	13.7041	3.82621	0.880549	0.0855378	-90.3542	29.4325	11.183	1.62306	6.10567	1.69527	5.07734	42.5127	27.7642	0.414811	Give-up (drowning in progress)	Give-up (drowning in progress)	Give-up (drowning in progress)
390	-90.6634	29.4656	16.4712	3.97777	0.770379	0.0212432	-90.6626	29.4651	13.9818	1.64841	15.1327	2.65952	-1.15092	55.5832	34.8173	0.628117	Keep-up (dynamic equilibrium)	Keep-up (dynamic equilibrium)	Keep-up (dynamic equilibrium)
392	-90.6674	29.4546	14.6331	3.78104	0.822292	0.0211305	-90.667	29.4542	12.1249	1.57045	5.79331	2.56756	6.3316	57.2778	37.3532	0.762117	Give-up (drowning in progress)	Give-up (drowning in progress)	Give-up (drowning in progress)
397	-90.2609	29.3522	12.9636	4.03425	0.852919	0.146375	-90.2606	29.3527	10.44	1.58052	6.46047	0.770058	3.97954	46.0206	29.0932	0.4726	Give-up (drowning in progress)	Give-up (drowning in progress)	Give-up (drowning complete)
398	-90.9185	29.3895	15.0087	4.22331	0.89141	0.0714538	-90.9172	29.3862	12.4783	1.72039	8.27081	0.80397	4.20749	35.6141	19.3487	0.34815	Give-up (drowning in progress)	Give-up (drowning in progress)	Give-up (drowning in progress)
399	-91.1055	29.3001	12.3245	4.77669	0.845311	0.158986	-91.1053	29.3	9.8171	1.58432	8.79246	0.857473	1.02464	42.1501	12.192	0.258556	Give-up (drowning projected)	Give-up (drowning in progress)	Give-up (drowning in progress)
400	-90.5084	29.4898	16.1474	3.99553	0.803116	0.0106001	-90.5083	29.4903	13.6392	1.63396	10.0841	0.784216	3.55515	47.9549	29.2608	0.514128	Give-up (drowning in progress)	Give-up (drowning in progress)	Give-up (drowning in progress)
416	-90.4811	29.4758	13.8564	3.99804	0.865147	0.013102	-90.4803	29.4762	11.3411	1.64227	9.86248	1.91834	1.47858	46.9808	21.5463	0.590256	Give-up (drowning in progress)	Give-up (drowning in progress)	Give-up (drowning in progress)
421	-90.8243	29.1719	13.7996	3.61628	0.853534	0.246049	-90.8235	29.1712	11.3093	1.52582	15.0604	0.792705	-3.75103	45.7031	24.384	0.159494	Speed-up	Catch-up	Catch-up
434	-90.7331	29.3204	8.76668	4.53707	0.570525	0.153378	-90.7313	29.3227	6.2518	2.03848	6.61496	0.498582	-0.363159	59.4454	28.0416	0.263583	Keep-up (dynamic equilibrium)	Keep-up (dynamic equilibrium)	Keep-up (dynamic equilibrium)
461	-91.3261	29.5847	40.1733	18.826	0.501091	0.131246	-91.3252	29.5848	37.6175	3.9974	21.8201	4.51085	15.7974	23.0892	14.6304	0.200678	Give-up (drowning in progress)	Give-up (drowning in progress)	Give-up (drowning in progress)
479	-91.4492	29.5235	5.25029	12.8022	0.527304	0.160843	-91.4491	29.5232	2.7	3.69691	27.4876	5.10629	-24.7876	19.7376	27.938	0.09395	Speed-up	Catch-up	Catch-up
482	-91.3541	29.5859	19.4824	16.5374	0.478807	0.143892	-91.3543	29.5858	16.9584	3.52405	11.2881	1.44783	5.67026	21.1323	21.1343	0.3408	Give-up (drowning in progress)	Give-up (drowning in progress)	Give-up (drowning in progress)
489	-91.5418	29.6013	14.645	3.61257	0.783199	0.243278	-91.5417	29.6012	12.1047	1.44122	-8.08735	5.9348	20.1921	13.7534	17.9466	0.158389	Give-up (drowning complete)	Give-up (drowning complete)	Give-up (drowning complete)
499	-91.855	29.5708	11.4953	4.08133	0.855999	0.087159	-91.8541	29.5704	8.98064	1.72683	5.11868	0.732184	3.86197	14.0387	21.1343	0.405218	Give-up (drowning in progress)	Give-up (drowning in progress)	Give-up (drowning in progress)
501	-92.2568	29.6394	13.4969	4.41166	0.781615	0.0910096	-92.2575	29.6393	10.9932	1.72842	2.30599	1.89936	8.68719	7.42066	23.1637	0.392333	Give-up (drowning in progress)	Give-up (drowning in progress)	Give-up (drowning in progress)
504	-91.8862	29.5367	15.0979	5.53851	0.540777	0.0052799	-91.8855	29.5358	12.6058	2.10549	8.09944	0.802276	4.50632	15.5894	19.2359	0.3525	Give-up (drowning in progress)	Give-up (drowning in progress)	Give-up (drowning in progress)
507	-92.225	29.5828	12.8492	5.50397	0.772156	0.104677	-92.2253	29.5821	10.3657	1.88498	-3.53231	1.45193	13.898	9.80723	17.6083	0.4458	Give-up (drowning in progress)	Give-up (drowning in progress)	Give-up (drowning complete)
508	-92.2265	29.64	20.6302	6.25349	0.698584	0.0366175	-92.2273	29.6403	18.1229	2.05933	3.46166	1.71209	14.6612	6.18535	12.7864	0.408567	Give-up (drowning in progress)	Give-up (drowning in progress)	Give-up (drowning in progress)
513	-91.6042	29.7927	16.0647	3.66599	0.533191	0.00455218	-91.6041	29.7927	13.5685	1.45289	7.31177	0.549972	6.25675	6.67653	15.8496	NaN	Give-up (drowning complete)	Give-up (drowning complete)	Give-up (drowning complete)
517	-91.5724	29.6427	9.89755	4.643	0.730077	0.273734	-91.5731	29.643	7.37205	1.67799	14.583	1.36871	-7.21092	11.0631	21.1343	0.394639	Speed-up	Speed-up	Speed-up
520	-91.8854	29.5849	17.8715	4.79275	0.845531	0.15529	-91.8858	29.5858	15.3542	1.80768	6.48088	1.18858	8.87328	13.5967	21.1343	0.311239	Give-up (drowning projected)	Give-up (drowning in progress)	Give-up (drowning in progress)
523	-91.8212	29.5788	13.4797	4.35918	0.860462	0.220321	-91.8221	29.5785	10.9817	1.82183	5.95347	0.87578	5.02821	13.8978	16.6238	0.298389	Give-up (drowning projected)	Give-up (drowning projected)	Give-up (drowning in progress)
531	-91.951	29.8561	13.7328	4.39514	0.781329	0.179205	-91.951	29.8562	13.7571	1.44576	5.68471	0.79169	8.07243	1.58413	11.7653	0.214139	Give-up (drowning projected)	Give-up (drowning projected)	Give-up (drowning in progress)
535	-92.1662	29.6423	13.8525	5.10652	0.803392	0.110214	-92.1668	29.643	13.8399	1.77602	3.91111	1.29599	9.9288	3.78867	18.0045	0.291467	Give-up (drowning in progress)	Give-up (drowning in progress)	Give-up (drowning in progress)
541	-92.0399	29.6172	12.1956	4.43674	0.788076	0.233365	-92.0401	29.618	9.68471	1.76285	0.555967	0.53593	9.12874	8.96039	17.8704	0.0690111	Give-up (drowning projected)	Give-up (drowning projected)	Give-up (drowning projected)
543	-91.6348	29.7524	12.1925	3.91471	0.81801	0.189105	-91.6356	29.7518	9.66795	2.01354	10.5053	1.74866	-0.83734	5.19894	20.4582	0.562628	Keep-up (stable equilibrium)	Keep-up (stable equilibrium)	Keep-up (stable equilibrium)
545	-91.6015	29.7122	11.8518	6.27143	0.735563	0.220248	-91.6011	29.7119	9.34372	1.8054	-16.6661	8.88793	26.0099	4.62861	18.0685	0.405694	Give-up (drowning complete)	Give-up (drowning complete)	Give-up (drowning complete)
547	-91.7022	29.8386	6.08049	5.84719	0.783098	0.160567	-91.7021	29.839	6.09119	1.82607	7.66574	0.998184	-1.57455	0.988956	12.8687	NaN	Speed-up	Speed-up	Catch-up
550	-91.697	29.7655	9.91864	4.61608	0.8196	0.208463	-91.697	29.7654	9.92068	1.42077	5.77588	0.90298	4.1448	-1.11647	18.1204	0.378956	Give-up (drowning projected)	Give-up (drowning projected)	Give-up (drowning in progress)
551	-91.54	29.7019	16.9763	8.85496	0.613802	0.0581684	-91.5398	29.702	14.4551	2.2843	-0.0789257	1.59862	14.534	9.84914	18.1386	0.600133	Give-up (drowning projected)	Give-up (drowning projected)	Give-up (drowning in progress)
553	-93.0057	29.85	20.6176	13.02	0.382935	0.00109603	-93.0064	29.8498	20.5711	4.51288	3.96483	3.43744	16.6063	2.92611	10.5796	0.5549	Give-up (drowning in progress)	Give-up (drowning in progress)	Give-up (drowning in progress)
554	-92.6648	29.8298	18.4944	12.4435	0.37641	0.00217739	-92.6659	29.8298	18.4695	3.26549	7.37331	1.8019	11.0962	1.64692	15.5174	0.336711	Give-up (drowning in progress)	Give-up (drowning in progress)	Give-up (drowning in progress)
557	-92.6673	29.9413	15.684	9.46191	0.259116	0.0039686	-92.667	29.9407	15.6607	2.41631	-3.7353	1.32263	19.396	-0.780976	8.19302	0.831167	Give-up (drowning in progress)	Give-up (drowning in progress)	Give-up (drowning in progress)
560	-92.5418	29.8507	22.7626	20.9562	0.235991	0.000644745	-92.5419	29.8509	22.7493	3.15488	-0.592383	1.4762	23.3417	0.434103	15.6362	0.8988	Give-up (drowning complete)	Give-up (drowning complete)	Give-up (drowning complete)
562	-92.7616	29.7659	18.9846	11.9659	0.37913	0.00215646	-92.7605	29.7663	16.5007	3.44886	6.74043	1.79	9.7603	5.78893	4.8768	0.582133	Give-up (drowning in progress)	Give-up (drowning in progress)	Give-up (drowning in progress)
565	-92.4508	29.7989	22.8283	14.0208	0.249181	0.000684272	-92.4512	29.7992	22.8438	2.92846	-2.70024	1.67235	25.5441	1.70629	14.5633	0.7219	Give-up (drowning in progress)	Give-up (drowning in progress)	Give-up (drowning in progress)
568	-92.4163	29.7845	17.2345	12.0144	0.356238	0.00293443	-92.4168	29.7855	17.2431	3.23151	1.10554	1.4741	16.1376	3.54739	14.3012	0.436467	Give-up (drowning in progress)	Give-up (drowning in progress)	Give-up (drowning in progress)
570	-92.3892	29.8006	20.4675	12.018	0.293207	0.000860318	-92.3886	29.8009	20.4927	3.07808	26.273	2.69979	-5.78029	1.78623	17.9741	0.7112	Catch-up	Catch-up	Catch-up
571	-92.2927	29.7096	14.2102	6.94809	0.42515	0.000787654	-92.2918	29.7091	11.7033	1.9874	8.18919	1.55033	3.5141	6.5935	15.7582	0.778706	Give-up (drowning in progress)	Give-up (drowning in progress)	Give-up (drowning in progress)
572	-92.2891	29.789	14.2795	8.73129	0.254352	0.00559277	-92.2887	29.7891	14.3012	2.16178	13.1646	0.915882	1.13664	0.206619	15.6294	0.5213	Give-up (drowning complete)	Give-up (drowning complete)	Give-up (drowning complete)
574	-92.6349	29.796	17.5509	11.2526	0.405423	0.00195047	-92.6356	29.7954	17.5477	3.73021	10.2312	1.78666	7.31646	2.38592	16.9621	0.552467	Give-up (drowning in progress)	Give-up (drowning in progress)	Give-up (drowning in progress)
575	-92.9496	29.932	29.0499	24.8599	NaN	0.00122146	-92.948	29.9406	29.1281	5.39618	10.5974	2.90468	18.5307	-0.27116	9.39394	0.900033	Give-up (drowning in progress)	Give-up (drowning in progress)	Give-up (drowning in progress)
576	-92.4806	29.5914	15.5021	5.36534	0.616508	0.00209747	-92.4803	29.5912	12.9905	1.91077	2.84226	1.4627	10.1483	9.35317	18.1874	0.301028	Give-up (drowning in progress)	Give-up (drowning in progress)	Give-up (drowning in progress)
580	-92.3231	29.6066	15.5684	4.16884	0.776682	0.00962554	-92.3231	29.6067	13.0362	1.77645	5.16964	0.639758	7.86659	10.2748	18.1021	0.535528	Give-up (drowning in progress)	Give-up (drowning in progress)	Give-up (drowning in progress)
581	-92.7282	29.6652	16.0113	7.53829	0.403296	0.0104631	-92.7282	29.6657	13.5114	2.35044	-2.17556	3.1868	15.687	7.18599	15.4412	0.240989	Give-up (drowning in progress)	Give-up (drowning in progress)	Give-up (drowning in progress)
583	-92.9169	29.8398	20.8182	14.0487	0.25372	0.00121612	-92.918	29.8389	18.3306	3.31244	3.76747	0.739888	14.5631	4.747	11.7043	0.617589	Give-up (drowning in progress)	Give-up (drowning in progress)	Give-up (drowning in progress)
587	-92.9126	29.7978	17.4201	14.3844	0.328441	0.00100069	-92.9128	29.7981	14.9448	3.75579	5.17437	0.609435	9.77039	7.9629	16.8981	0.312167	Give-up (drowning in progress)	Give-up (drowning in progress)	Give-up (drowning in progress)
588	-92.8229	29.7733	19.1012	9.16244	0.447454	0.00229817	-92.8232	29.7737	16.619	3.02272	3.75339	2.15571	12.8656	6.28554	9.57377	0.467022	Give-up (drowning in progress)	Give-up (drowning in progress)	Give-up (drowning in progress)
590	-92.8276	29.9332	17.6603	11.3286	0.376846	0.0031481	-92.8272	29.9324	17.6791	3.17925	7.8474	1.90529	9.83175	0.551733	8.4643	0.418733	Give-up (drowning complete)	Give-up (drowning complete)	Give-up (drowning complete)
595	-92.6374	29.8537	15.8587	11.5593	0.327826	0.00264053	-92.6364	29.8534	15.7811	3.4702	4.30629	1.04012	11.4748	0.734382	10.4638	0.636367	Give-up (drowning in progress)	Give-up (drowning in progress)	Give-up (drowning in progress)
600	-92.5348	29.5768	16.102	4.39652	0.841975	0.215597	-92.5419	29.5777	13.5876	2.05467	6.13528	2.48862	7.45233	8.65377	16.8554	0.136833	Give-up (drowning projected)	Give-up (drowning projected)	Give-up (drowning in progress)
603	-92.7601	29.8018	19.1535	12.1067	0.381669	0.00384107	-92.7606	29.8028	16.6593	3.30976	18.5994	2.7624	-1.94006	4.54839	23.878	0.749433	Catch-up	Catch-up	Catch-up
604	-92.7561	29.7579	21.4445	11.746	0.409465	0.00164378	-92.7564	29.7574	18.9554	4.15538	2.85119	1.51519	16.1042	5.87568	16.8067	0.264667	Give-up (drowning in progress)	Give-up (drowning in progress)	Give-up (drowning in progress)
605	-92.9157	29.8604	22.1897	12.637	0.356062	0.00189917	-92.9157	29.8608	22.2251	3.9287	3.82776	1.23074	18.3973	3.02542	18.0503	0.393483	Give-up (drowning in progress)	Give-up (drowning in progress)	Give-up (drowning in progress)
608	-92.6713	29.6763	22.1793	10.0458	0.369174	0.0026965	-92.6667	29.672	19.6616	3.25396	4.82178	2.59354	14.8398	6.35935	13.0576	0.424733	Give-up (drowning in progress)	Give-up (drowning in progress)	Give-up (drowning in progress)
609	-92.604	29.6398	12.6284	5.78455	0.74557	0.0176445	-92.6044	29.6394	10.1086	2.07562	3.4402	0.531058	6.66842	6.94011	16.8646	0.23875	Give-up (drowning in progress)	Give-up (drowning in progress)	Give-up (drowning in progress)
614	-92.8854	29.7371	19.6022	7.89835	0.490565	0.00246866	-92.8856	29.7373	17.1053	2.41611	5.99295	2.34821	11.1124	9.0445	24.2865	0.292856	Give-up (drowning complete)	Give-up (drowning complete)	Give-up (drowning complete)
615	-92.8216	29.6798	18.5105	9.98037	0.350641	0.00153584	-92.822	29.6802	16.0155	2.60796	-0.405416	1.22959	16.421	8.58765	15.6454	0.209856	Give-up (drowning in progress)	Give-up (drowning in progress)	Give-up (drowning in progress)
616	-92.2612	29.7309	12.1565	6.05923	0.660581	0.0344789	-92.2605	29.7301	9.66691	1.98318	2.52874	1.66112	7.13817	5.54975	8.19912	0.587278	Give-up (drowning in progress)	Give-up (drowning in progress)	Give-up (drowning in progress)
618	-92.2583	29.7356	13.2209	6.49528	0.678382	0.068712	-92.2605	29.7374	10.7033	1.99574	3.12843	0.725817	7.57489	4.71584	8.01929	0.471417	Give-up (drowning in progress)	Give-up (drowning in progress)	Give-up (drowning in progress)
619	-92.2617	29.6867	13.4694	4.50812	0.483277	0.00119495	-92.2616	29.6863	10.9555	1.62659	2.82153	1.18678	8.13396	6.41274	14.1092	0.571367	Give-up (drowning complete)	Give-up (drowning complete)	Give-up (drowning complete)
623	-92.5085	29.6358	14.5251	5.9496	0.727774	0.00201846	-92.5096	29.6357	12.0414	2.00021	7.81806	1.92656	4.2233	7.77798	18.0899	0.362983	Give-up (drowning in progress)	Give-up (drowning in progress)	Give-up (drowning in progress)
624	-92.8863	29.8599	21.0292	13.3001	0.30068	0.00120314	-92.8855	29.8608	21.0349	3.0552	10.653	1.40458	10.3819	3.62325	19.937	0.691583	Give-up (drowning in progress)	Give-up (drowning in progress)	Give-up (drowning in progress)
626	-92.6036	29.6936	24.2816	11.6526	0.372369	0.00246143	-92.6044	29.6938	21.7291	3.20206	0.444214	0.832995	21.2848	5.62	10.7472	0.253178	Give-up (drowning in progress)	Give-up (drowning in progress)	Give-up (drowning in progress)
632	-92.3858	29.5684	15.5119	6.31756	0.355354	0.00179451	-92.3855	29.5686	12.9727	2.22976	3.67775	3.52413	9.29496	11.5879	19.2847	0.301906	Give-up (drowning in progress)	Give-up (drowning in progress)	Give-up (drowning in progress)
633	-92.3231	29.5639	13.0242	4.46893	0.755344	0.0413076	-92.323	29.5631	10.5286	1.77695	1.75438	1.67432	8.77425	12.8923	19.2237	0.342994	Give-up (drowning in progress)	Give-up (drowning in progress)	Give-up (drowning in progress)
635	-93.4796	29.9188	24.8503	8.50071	0.350772	0.00106539	-93.4793	29.9188	24.8862	3.00229	-5.45392	2.2252	30.3402	1.8786	16.0691	0.502583	Give-up (drowning in progress)	Give-up (drowning in progress)	Give-up (drowning in progress)
638	-93.5118	29.869	23.4658	9.32929	0.502887	0.00359184	-93.5105	29.868	23.4909	2.53042	-2.57947	1.06916	26.0704	1.97266	21.8603	0.448394	Give-up (drowning in progress)	Give-up (drowning in progress)	Give-up (drowning in progress)
641	-93.5106	29.8963	23.5571	9.41564	0.508586	0.00214289	-93.5105	29.8968	23.577	2.30042	-0.353925	1.02034	23.9309	1.32228	21.1343	0.507433	Give-up (drowning in progress)	Give-up (drowning in progress)	Give-up (drowning in progress)
644	-93.2921	29.8322	19.384	7.84148	0.515208	0.00622264	-93.2929	29.8317	16.8753	3.10548	4.66356	1.6377	12.2117	11.679	12.8656	0.3396	Give-up (drowning in progress)	Give-up (drowning in progress)	Give-up (drowning in progress)
645	-93.1991	29.8467	20.6751	8.39497	0.526959	0.00562693	-93.198	29.8461	18.2089	2.46393	5.31068	1.78111	12.8982	6.3172	13.0363	0.374783	Give-up (drowning in progress)	Give-up (drowning in progress)	Give-up (drowning in progress)
648	-93.1701	29.8398	25.0712	8.28191	0.492567	0.00394467	-93.1689	29.838	22.5599	3.21388	2.53751	0.714767	20.0224	5.94686	19.178	0.481339	Give-up (drowning in progress)	Give-up (drowning in progress)	Give-up (drowning in progress)
651	-93.5143	29.9643	18.6095	8.25065	0.584797	0.00235505	-93.5107	29.9623	18.5784	2.25112	-2.50095	1.11619	21.0793	-0.235316	19.5072	0.290978	Give-up (drowning in progress)	Give-up (drowning in progress)	Give-up (drowning in progress)
655	-93.4159	29.7992	26.2817	6.18619	0.568748	0.00737308	-93.4168	29.7991	23.7585	2.07069	3.69235	0.823307	20.0662	8.71947	16.7853	0.24	Give-up (drowning in progress)	Give-up (drowning in progress)	Give-up (drowning in progress)
658	-93.6046	30.0551	18.1818	6.51065	0.659555	0.100005	-93.6043	30.0558	18.1873	1.91666	3.97316	0.623503	14.2142	-0.536004	9.41222	0.301972	Give-up (drowning in progress)	Give-up (drowning in progress)	Give-up (drowning in progress)
660	-93.6666	29.9186	17.4136	7.0594	0.609881	0.00793574	-93.6682	29.9179	17.4114	1.99584	-2.94287	1.04096	20.3543	-0.978264	21.1343	0.54775	Give-up (drowning in progress)	Give-up (drowning in progress)	Give-up (drowning in progress)
661	-93.6323	29.8462	19.7625	8.08671	0.593289	0.00514035	-93.6309	29.8497	19.7625	2.06629	-1.18785	1.23164	20.9504	-0.155352	16.8402	0.49285	Give-up (drowning in progress)	Give-up (drowning in progress)	Give-up (drowning in progress)
663	-93.6972	30.0117	18.6081	7.06413	0.661835	0.0238398	-93.6991	30.0131	18.6279	2.07091	2.71303	0.654407	15.9149	-0.251935	21.4488	0.489883	Give-up (drowning in progress)	Give-up (drowning in progress)	Give-up (drowning in progress)
665	-93.6944	29.9587	21.2292	6.88901	0.32261	0.00634434	-93.6939	29.9589	21.2167	2.04087	3.79389	1.20194	17.4228	-0.713475	23.113	0.733606	Give-up (drowning complete)	Give-up (drowning complete)	Give-up (drowning complete)
669	-93.7273	29.8812	18.824	7.75723	0.610983	0.00438654	-93.7283	29.8816	18.871	2.02333	-4.36158	2.0447	23.2326	-0.978264	21.1343	0.549756	Give-up (drowning in progress)	Give-up (drowning in progress)	Give-up (drowning in progress)
672	-93.4156	29.8334	19.7491	5.67587	0.690143	0.0105145	-93.4167	29.8317	17.225	2.21001	10.7516	1.61166	6.47339	8.71947	17.0688	0.212133	Give-up (drowning in progress)	Give-up (drowning in progress)	Give-up (drowning in progress)
677	-93.5353	29.8575	24.0774	9.05908	0.446241	0.00238871	-93.5417	29.8536	24.0795	2.64765	6.39829	1.53688	17.6812	1.23281	13.2222	0.591706	Give-up (drowning in progress)	Give-up (drowning in progress)	Give-up (drowning in progress)
680	-93.5133	29.7736	23.7359	9.06009	NaN	0.00174762	-93.5126	29.7736	23.7339	2.28666	3.2507	1.44792	20.4832	1.23281	13.0729	0.0944167	Give-up (drowning in progress)	Give-up (drowning in progress)	Give-up (drowning in progress)
682	-93.5752	29.8236	23.1386	8.83043	0.423647	0.00214615	-93.5761	29.8244	23.1222	2.1811	2.08225	0.948536	21.0399	-0.155352	12.9113	0.288294	Give-up (drowning in progress)	Give-up (drowning in progress)	Give-up (drowning in progress)
683	-93.6661	29.8906	17.0389	7.14309	0.616574	0.00682881	-93.6666	29.8887	17.0559	1.85985	0.941454	0.536988	16.1144	-0.978264	28.0416	0.662961	Give-up (drowning in progress)	Give-up (drowning in progress)	Give-up (drowning in progress)
684	-93.825	29.8187	14.509	6.8123	0.641873	0.126497	-93.8252	29.818	14.4887	1.89642	4.03329	1.15817	10.4554	-0.978264	14.6297	0.454989	Give-up (drowning in progress)	Give-up (drowning in progress)	Give-up (drowning in progress)
685	-93.3868	29.889	10.3867	5.42563	0.783176	0.136673	-93.3855	29.8897	7.85665	1.83302	0.657288	0.254659	7.19936	9.31899	23.1648	0.181528	Give-up (drowning in progress)	Give-up (drowning in progress)	Give-up (drowning in progress)
687	-93.3579	29.9392	13.2824	6.56381	0.56462	0.152768	-93.3574	29.9387	10.7716	2.29078	4.75641	0.347943	6.01519	6.70891	10.6589	0.298722	Give-up (drowning in progress)	Give-up (drowning in progress)	Give-up (drowning in progress)
691	-93.1052	29.9627	27.7092	11.3466	0.323108	0.000896439	-93.1044	29.9625	27.6525	4.29837	0.61797	1.27948	27.0345	-0.843449	11.8318	0.7493	Give-up (drowning in progress)	Give-up (drowning in progress)	Give-up (drowning in progress)
693	-93.6353	29.8977	19.8492	7.42714	0.44346	0.000781125	-93.6356	29.8969	19.8361	2.20247	0.0633099	1.02265	19.7727	-0.978264	21.1343	0.577861	Give-up (drowning in progress)	Give-up (drowning in progress)	Give-up (drowning in progress)
697	-93.6692	30.0623	19.0754	6.68599	0.589064	0.0632815	-93.6689	30.0618	19.068	2.00299	3.78504	1.19962	15.2829	-0.260177	8.5344	0.411583	Give-up (drowning in progress)	Give-up (drowning in progress)	Give-up (drowning in progress)
978	-90.2929	29.3232	11.7445	3.82297	0.863997	0.167837	-90.2925	29.3235	9.2277	1.547	7.95768	1.0269	1.27001	56.0127	36.4998	0.371878	Give-up (drowning in progress)	Give-up (drowning complete)	Give-up (drowning complete)
1024	-89.3786	29.8749	14.0308	3.997	0.840232	0.261889	-89.3788	29.8747	11.5041	1.77518	10.2036	0.433805	1.30044	29.9678	14.6304	0.182611	Give-up (drowning projected)	Give-up (drowning in progress)	Give-up (drowning in progress)
1069	-89.2214	30.046	12.1198	3.16736	0.86395	0.26709	-89.2215	30.0459	9.57856	1.57782	3.45318	0.664352	6.12538	20.7706	20.385	0.0608611	Give-up (drowning projected)	Give-up (drowning in progress)	Give-up (drowning in progress)
1100	-92.4492	29.6584	23.8694	11.7631	0.304663	0.00135777	-92.4501	29.6584	21.3336	2.98075	8.69776	2.50282	12.6358	7.32712	14.6304	0.640267	Give-up (drowning in progress)	Give-up (drowning in progress)	Give-up (drowning in progress)
1130	-92.3855	29.701	25.1652	11.6942	0.336328	0.0027677	-92.3855	29.7011	22.6579	3.16735	1.29629	2.67452	21.3616	9.70956	20.4826	0.40355	Give-up (drowning in progress)	Give-up (drowning in progress)	Give-up (drowning in progress)
1205	-93.5754	29.875	18.7281	9.55969	0.489373	0.00318631	-93.5762	29.8753	18.7191	2.46932	2.29995	0.78	16.4191	-0.155352	14.2342	0.50485	Give-up (drowning in progress)	Give-up (drowning in progress)	Give-up (drowning in progress)
1277	-92.4778	29.824	22.9221	14.9364	0.239368	0.000746308	-92.4792	29.8246	22.9117	2.95377	3.09167	1.59734	19.82	0.676065	25.4599	0.726967	Give-up (drowning in progress)	Give-up (drowning in progress)	Give-up (drowning in progress)
1409	-93.0103	29.8688	24.0555	14.295	0.370355	0.00153529	-93.0106	29.869	24.1369	4.34666	3.12641	1.89395	21.0104	2.39703	10.7076	0.492572	Give-up (drowning in progress)	Give-up (drowning in progress)	Give-up (drowning in progress)
1650	-92.0415	29.8107	12.5635	4.60218	0.805555	0.203003	-92.0407	29.8108	12.5626	1.5219	2.7034	0.832507	9.85917	2.06294	7.3152	0.393944	Give-up (drowning projected)	Give-up (drowning in progress)	Give-up (drowning in progress)
1738	-93.2293	29.8539	17.8857	8.07666	0.562035	0.0120121	-93.2293	29.8534	15.3386	2.35993	4.09991	1.17686	11.2387	6.77411	14.3744	0.430739	Give-up (drowning in progress)	Give-up (drowning in progress)	Give-up (drowning in progress)
1743	-93.231	29.8905	16.7726	8.20147	0.427651	0.0197687	-93.2304	29.8896	16.7702	2.22547	2.46227	0.683498	14.3079	3.51595	15.557	0.456656	Give-up (drowning in progress)	Give-up (drowning in progress)	Give-up (drowning in progress)
1838	-93.6947	29.7862	38.8838	12.349	0.358201	0.000961597	-93.6961	29.7854	38.8723	4.07136	2.13662	1.73579	36.7356	-0.978264	15.4198	0.417061	Give-up (drowning in progress)	Give-up (drowning in progress)	Give-up (drowning in progress)
1858	-93.5122	29.8361	24.1473	10.7282	0.233252	0.000710046	-93.5106	29.839	24.1302	2.67154	-1.10355	0.296022	25.2338	1.23281	22.9819	0.303178	Give-up (drowning in progress)	Give-up (drowning in progress)	Give-up (drowning in progress)
2041	-92.1634	29.7706	13.0843	4.43809	0.773275	0.204021	-92.1627	29.7699	10.5531	1.72068	2.82274	1.06697	7.7304	7.34041	18.1621	0.2201	Give-up (drowning projected)	Give-up (drowning projected)	Give-up (drowning in progress)
2154	-93.694	29.845	20.5643	8.04694	0.721216	0.00478236	-93.6939	29.8438	20.5901	2.75411	4.99294	0.863117	15.5971	-0.978264	18.288	0.443106	Give-up (drowning in progress)	Give-up (drowning in progress)	Give-up (drowning in progress)
2156	-93.6984	29.8754	20.7794	7.75055	0.632392	0.00341048	-93.6991	29.8762	20.774	2.64848	-2.74625	1.75369	23.5203	-0.978264	21.1343	0.595183	Give-up (drowning in progress)	Give-up (drowning in progress)	Give-up (drowning in progress)
2219	-93.6011	29.7676	22.1531	10.1285	0.289393	0.000812454	-93.6033	29.7683	22.1345	2.68599	6.23097	0.526489	15.9035	-0.155352	20.3728	0.17815	Give-up (drowning in progress)	Give-up (drowning in progress)	Give-up (drowning in progress)
2334	-93.5109	29.8822	23.165	9.22317	0.480604	0.00528332	-93.5116	29.8826	23.1335	2.2439	5.33785	1.16207	17.7956	1.68582	21.1343	0.462772	Give-up (drowning in progress)	Give-up (drowning in progress)	Give-up (drowning in progress)
2418	-93.168	29.8726	14.0191	8.64018	0.539282	0.00251034	-93.1689	29.8725	14.0651	2.24383	0.306684	2.2013	13.7585	3.35689	15.2461	0.336822	Give-up (drowning in progress)	Give-up (drowning in progress)	Give-up (drowning in progress)
2493	-92.8875	29.8258	18.4401	12.1991	0.317314	0.00467199	-92.8879	29.8257	15.8928	3.12135	5.9465	1.00136	9.94634	7.60371	9.7536	0.502172	Give-up (drowning in progress)	Give-up (drowning in progress)	Give-up (drowning in progress)
2568	-91.3543	29.5639	17.5678	14.5393	0.549605	0.147409	-91.3542	29.5641	15.0891	3.12896	9.72744	1.01169	5.36166	20.6853	24.384	0.362139	Give-up (drowning in progress)	Give-up (drowning in progress)	Give-up (drowning in progress)
2608	-89.3179	29.2283	26.9771	12.5156	0.554825	0.165335	-89.3173	29.2281	24.5228	2.997	13.4647	1.49116	11.058	83.8598	20.7264	0.152456	Give-up (drowning in progress)	Give-up (drowning in progress)	Give-up (drowning in progress)
2614	-89.3242	29.3413	19.0349	6.14208	0.67613	0.205097	-89.3241	29.3415	16.5235	2.06911	11.1223	0.914076	5.40118	53.3159	27.813	0.168822	Give-up (drowning in progress)	Give-up (drowning in progress)	Give-up (drowning in progress)
2634	-89.2597	29.2307	29.5702	9.22618	0.589247	0.146321	-89.2593	29.231	27.0714	2.21911	27.0361	1.69194	0.035392	83.7417	19.5072	0.0929722	Keep-up (dynamic equilibrium)	Keep-up (dynamic equilibrium)	Keep-up (dynamic equilibrium)
2830	-90.345	30.0401	13.7455	4.85618	0.799681	0.0396919	-90.3447	30.0399	11.275	2.17023	5.71897	0.739696	5.556	22.0637	30.2392	0.260339	Give-up (drowning in progress)	Give-up (drowning in progress)	Give-up (drowning in progress)
2854	-89.9833	30.3006	14.2688	4.70792	0.802566	0.031141	-89.9834	30.3008	14.2778	1.81314	12.3014	1.87088	1.97632	0.766264	12.9723	0.525967	Give-up (drowning in progress)	Give-up (drowning in progress)	Give-up (drowning in progress)
3054	-90.3578	29.7219	11.677	4.92355	0.861503	0.034114	-90.3573	29.7219	9.18782	1.9006	9.56308	0.553476	-0.375267	42.7872	26.8224	0.616939	Keep-up (dynamic equilibrium)	Keep-up (dynamic equilibrium)	Keep-up (dynamic equilibrium)
3136	-90.6387	29.9495	13.4759	5.92198	0.748133	0.00976721	-90.6386	29.9498	10.9556	2.09477	6.1988	1.32735	4.75681	11.4409	21.464	0.47275	Give-up (drowning in progress)	Give-up (drowning in progress)	Give-up (drowning in progress)
3296	-90.479	29.384	12.9484	3.48633	0.784213	0.221055	-90.4792	29.3899	10.4674	1.70851	11.7608	0.66146	-1.29343	59.4095	43.6931	0.234722	Speed-up	Speed-up	Catch-up
3565	-90.0996	29.4972	15.5421	3.71059	0.888784	0.094318	-90.1021	29.4987	13.0246	2.18138	5.14953	0.707396	7.87512	43.2818	27.7246	0.258406	Give-up (drowning in progress)	Give-up (drowning in progress)	Give-up (drowning in progress)
3601	-89.9476	29.5742	12.4881	3.68577	0.835728	0.107436	-89.9481	29.5751	9.99334	1.70882	-2.02263	1.07689	12.016	36.6353	28.0402	0.396528	Give-up (drowning in progress)	Give-up (drowning in progress)	Give-up (drowning in progress)
3617	-89.9144	29.5471	10.3386	3.67878	0.859823	0.115133	-89.9137	29.5478	7.82745	1.56092	7.17563	1.19715	0.65182	38.4977	29.0657	0.377561	Keep-up (dynamic equilibrium)	Keep-up (dynamic equilibrium)	Keep-up (dynamic equilibrium)
3626	-89.8541	30.1078	14.4661	4.45807	0.79226	0.0798695	-89.8542	30.1075	11.9657	2.01103	3.79901	0.652607	8.16667	8.47889	23.9725	0.376128	Give-up (drowning in progress)	Give-up (drowning in progress)	Give-up (drowning in progress)
3639	-89.8515	29.9046	13.1319	3.26038	0.745354	0.0695569	-89.852	29.9048	10.6119	1.56061	0.481687	0.97299	10.1303	29.5282	22.8539	0.42815	Give-up (drowning in progress)	Give-up (drowning in progress)	Give-up (drowning in progress)
3641	-89.8551	29.9184	11.7901	3.1832	0.768514	0.0849917	-89.8552	29.9188	9.24818	1.54164	6.15381	1.06103	3.09437	27.546	23.8232	0.450783	Give-up (drowning in progress)	Give-up (drowning in progress)	Give-up (drowning in progress)
3650	-89.8231	30.0565	14.0096	4.57416	0.815896	0.21512	-89.8229	30.0567	11.4884	2.01457	6.02611	0.549388	5.4623	14.8768	23.7835	0.149778	Give-up (drowning in progress)	Give-up (drowning in progress)	Give-up (drowning in progress)
3664	-89.826	29.9125	12.2495	3.07889	0.757692	0.0793682	-89.8261	29.9124	9.76033	1.57699	3.36164	0.553945	6.3987	24.5755	26.1336	0.148444	Give-up (drowning in progress)	Give-up (drowning in progress)	Give-up (drowning in progress)
3680	-89.7922	29.5115	13.8483	3.63797	0.854258	0.121759	-89.7918	29.5124	11.3356	1.48673	8.6601	1.17555	2.67553	42.0095	21.9456	0.4504	Give-up (drowning in progress)	Give-up (drowning in progress)	Give-up (drowning in progress)
3784	-89.6651	30.1573	12.8301	3.88858	0.853983	0.16396	-89.6646	30.1567	10.3309	1.76541	3.49672	0.450421	6.83417	5.51364	19.5072	0.194506	Give-up (drowning in progress)	Give-up (drowning in progress)	Give-up (drowning complete)
3800	-89.6676	29.8406	14.8129	5.19195	0.766589	0.0236751	-89.6676	29.8401	12.2979	2.2659	2.87668	0.488373	9.42119	29.1165	19.2542	0.377	Give-up (drowning in progress)	Give-up (drowning in progress)	Give-up (drowning in progress)
3913	-90.4782	30.1655	24.4891	5.44498	0.759069	0.0450384	-90.4791	30.1656	22.0066	2.28455	13.8704	0.729025	8.13623	11.6579	18.9464	NaN	Give-up (drowning in progress)	Give-up (drowning in progress)	Give-up (drowning in progress)
3985	-90.1498	29.7182	9.89519	4.22809	0.845554	0.0407429	-90.1489	29.7175	7.41242	1.7676	6.4936	0.445159	0.918821	26.5022	25.6032	0.6641	Give-up (drowning complete)	Give-up (drowning complete)	Give-up (drowning complete)
4014	-91.323	29.5486	18.9255	13.1101	0.555803	0.163705	-91.323	29.5487	16.3911	2.82377	7.49566	0.59184	8.89544	22.5593	24.384	0.35545	Give-up (drowning projected)	Give-up (drowning in progress)	Give-up (drowning in progress)
4016	-91.3857	29.5628	18.7127	13.0941	0.540856	0.150186	-91.3855	29.563	16.1638	2.9074	5.30552	0.810931	10.8583	18.5058	21.1343	0.415844	Give-up (drowning in progress)	Give-up (drowning in progress)	Give-up (drowning in progress)
4045	-91.0103	29.38	18.56	4.45616	0.749511	0.0897389	-91.0097	29.3804	16.0442	1.69519	7.28096	0.590467	8.76327	39.5396	23.1648	0.557178	Give-up (drowning projected)	Give-up (drowning in progress)	Give-up (drowning in progress)
4094	-90.1508	30.3896	14.1696	4.93147	0.823079	0.0775144	-90.1508	30.3894	11.6158	2.1451	6.43097	0.336571	5.18479	12.0522	16.892	0.369778	Give-up (drowning in progress)	Give-up (drowning in progress)	Give-up (drowning in progress)
4103	-90.0387	29.6577	13.0927	3.90276	0.856969	0.0483284	-90.0395	29.6584	10.6347	1.69488	8.21942	1.84124	2.41526	37.6398	26.8224	0.530239	Give-up (drowning in progress)	Give-up (drowning in progress)	Give-up (drowning in progress)
4107	-89.8523	30.0542	-22.7123	19.6202	NaN	0.00108462	-89.8533	30.0549	-25.1775	3.00331	-6.05228	1.60654	-19.1252	12.8927	20.4094	0.419794	Speed-up	Speed-up	Speed-up
4110	-89.6667	30.2019	9.77606	4.12762	0.834839	0.160786	-89.6664	30.2021	9.76757	1.51463	2.64826	0.724058	7.11931	3.58567	17.846	0.329328	Give-up (drowning projected)	Give-up (drowning projected)	Give-up (drowning in progress)
4218	-90.1648	29.5634	11.2259	3.74581	0.877298	0.0799006	-90.1646	29.5631	8.72932	1.60424	7.21132	0.841109	1.51801	40.2682	27.5631	0.372006	Give-up (drowning in progress)	Give-up (drowning in progress)	Give-up (drowning in progress)
4406	-89.7272	30.2027	14.3144	4.55675	0.821618	0.0396086	-89.728	30.2018	14.2947	1.76301	5.99778	0.688345	8.29687	0.253523	21.1343	0.43455	Give-up (drowning in progress)	Give-up (drowning in progress)	Give-up (drowning in progress)
4407	-89.7312	30.2224	11.0922	4.56364	0.833254	0.0205502	-89.7303	30.2228	11.0921	1.66751	2.82834	0.393328	8.26378	-0.189455	13.146	0.522744	Give-up (drowning in progress)	Give-up (drowning in progress)	Give-up (drowning in progress)
4455	-90.9473	29.2589	12.285	3.69122	0.867488	0.199272	-90.948	29.2583	9.76392	1.43318	9.87696	0.429148	-0.113041	58.9429	29.8978	0.199644	Keep-up (dynamic equilibrium)	Keep-up (dynamic equilibrium)	Keep-up (dynamic equilibrium)
4529	-89.8216	29.4706	14.5229	3.61904	0.884189	0.219444	-89.8219	29.4705	12.0031	1.55402	9.72744	0.79876	2.2757	43.8232	26.5572	0.195567	Give-up (drowning projected)	Give-up (drowning in progress)	Give-up (drowning in progress)
4551	-89.6037	29.8528	16.7187	3.97246	0.781955	0.244376	-89.6042	29.8534	14.2203	1.99917	10.2464	0.587862	3.97386	27.9802	27.7063	0.2684	Give-up (drowning in progress)	Give-up (drowning in progress)	Give-up (drowning complete)
4557	-89.5731	29.8241	17.1641	3.88139	0.7858	0.232583	-89.574	29.8244	14.654	1.787	10.2888	0.408997	4.3652	20.8457	24.192	0.286233	Give-up (drowning in progress)	Give-up (drowning in progress)	Give-up (drowning complete)
4572	-89.4813	30.0571	12.077	4.20784	0.858734	0.242521	-89.4812	30.0568	9.56641	1.76583	4.52822	0.454474	5.03819	16.0576	24.1341	0.223039	Give-up (drowning projected)	Give-up (drowning in progress)	Give-up (drowning in progress)
4596	-89.4515	30.0557	16.1932	4.30308	0.836232	0.256544	-89.4512	30.0557	13.6631	1.88218	4.1238	0.52585	9.53932	17.0121	25.0088	0.150383	Give-up (drowning in progress)	Give-up (drowning in progress)	Give-up (drowning in progress)
4626	-89.1978	29.3374	28.1024	3.95119	0.880262	0.199591	-89.1979	29.3373	25.5935	1.6642	16.4636	0.850923	9.12987	72.1162	25.3594	0.0937111	Give-up (drowning in progress)	Give-up (drowning in progress)	Give-up (drowning complete)
4690	-90.0396	29.4986	14.9296	3.59559	0.883356	0.140055	-90.0396	29.4987	12.4141	1.59725	5.92142	0.322365	6.49264	42.2031	20.5496	0.377483	Give-up (drowning in progress)	Give-up (drowning in progress)	Give-up (drowning complete)
4779	-91.4476	29.6414	20.1398	18.4481	0.43252	0.0243387	-91.4474	29.642	17.6063	3.83449	6.78204	1.75626	10.8242	14.7988	19.5072	NaN	Give-up (drowning in progress)	Give-up (drowning in progress)	Give-up (drowning in progress)
4782	-91.4424	29.6648	22.3958	23.593	0.458002	0.110965	-91.4429	29.6646	19.8483	4.73666	8.19283	1.2568	11.6555	13.0767	23.9146	NaN	Give-up (drowning in progress)	Give-up (drowning in progress)	Give-up (drowning in progress)
4808	-91.4155	29.6354	20.4155	21.7164	0.434934	0.0627652	-91.4158	29.6357	17.863	4.37086	8.0902	1.4391	9.77278	17.2926	24.384	NaN	Give-up (drowning in progress)	Give-up (drowning in progress)	Give-up (drowning in progress)
4900	-91.2592	29.6349	40.695	29.1112	0.400048	0.063404	-91.2595	29.6357	38.27	5.97781	11.1422	1.04939	27.1277	29.3559	14.6304	NaN	Give-up (drowning in progress)	Give-up (drowning in progress)	Give-up (drowning in progress)
4938	-91.3239	29.6158	-10.3561	22.9146	0.366532	0.101775	-91.3254	29.6174	-12.7398	4.77689	7.68269	1.04283	-20.4225	23.9964	26.8224	NaN	Catch-up	Catch-up	Catch-up
5035	-91.0368	29.6245	18.8974	13.1369	0.558826	0.0273413	-91.0364	29.6248	16.4205	2.90667	4.85761	1.30928	11.5629	38.2705	33.6499	NaN	Give-up (drowning in progress)	Give-up (drowning in progress)	Give-up (drowning in progress)
5167	-90.7785	30.1432	16.5297	7.03852	0.656347	0.0340515	-90.7786	30.1437	16.5311	2.71852	3.91084	2.1921	12.6202	3.5783	10.9728	NaN	Give-up (drowning in progress)	Give-up (drowning in progress)	Give-up (drowning complete)
5255	-90.6013	30.1929	16.8415	5.71089	0.731688	0.0331901	-90.6014	30.1928	16.8227	2.21251	7.78976	0.577563	9.03292	1.89725	8.5344	NaN	Give-up (drowning in progress)	Give-up (drowning in progress)	Give-up (drowning in progress)
5267	-90.6022	30.2998	15.8983	5.55927	0.775439	0.0495134	-90.6023	30.2996	15.927	2.33635	7.26604	0.693664	8.66101	-1.71131	21.1343	NaN	Give-up (drowning in progress)	Give-up (drowning in progress)	Give-up (drowning in progress)
5414	-90.6338	30.1583	14.6213	6.79182	0.680642	0.0197975	-90.6337	30.1582	14.5918	2.494	6.18185	0.420405	8.40995	2.48895	19.5072	NaN	Give-up (drowning in progress)	Give-up (drowning in progress)	Give-up (drowning complete)
5845	-90.6833	30.1834	18.8119	5.99323	0.645271	0.046224	-90.6836	30.1847	18.8505	2.63915	6.44956	0.743224	12.401	1.98735	20.7264	NaN	Give-up (drowning in progress)	Give-up (drowning in progress)	Give-up (drowning in progress)
6038	-91.3526	29.6048	19.7023	21.2498	0.457135	0.122063	-91.352	29.6048	17.2006	4.2617	11.1769	0.900958	6.02374	21.7028	23.1648	NaN	Give-up (drowning in progress)	Give-up (drowning in progress)	Give-up (drowning in progress)
6088	-89.658	30.3153	25.0878	13.0859	0.42164	0.187914	-89.6579	30.3151	25.0873	5.25615	3.56284	0.488032	21.5245	-1.83936	24.8717	NaN	Give-up (drowning in progress)	Give-up (drowning in progress)	Give-up (drowning in progress)
6090	-89.6621	30.3255	29.6886	14.7103	0.376051	0.185515	-89.6628	30.3252	29.6593	6.02529	10.8511	0.58977	18.8082	-2.4336	24.384	NaN	Give-up (drowning in progress)	Give-up (drowning in progress)	Give-up (drowning in progress)
6209	-90.2589	30.3761	18.9745	5.97457	0.706948	0.0493956	-90.2587	30.3759	16.4985	2.57701	6.34546	0.985791	10.153	5.09408	13.4112	NaN	Give-up (drowning in progress)	Give-up (drowning in progress)	Give-up (drowning in progress)
6299	-90.3508	30.0481	19.7352	4.35815	0.767262	0.0237177	-90.3504	30.0484	17.235	1.97862	8.59478	0.608091	8.64024	20.2647	34.0126	0.1761	Give-up (drowning in progress)	Give-up (drowning complete)	Give-up (drowning complete)
6301	-93.411	29.9639	20.9122	6.9341	0.522316	0.00214072	-93.4107	29.9615	20.9053	1.86824	3.60106	0.503914	17.3042	2.78777	15.8488	0.121967	Give-up (drowning in progress)	Give-up (drowning in progress)	Give-up (drowning in progress)
6303	-90.1906	29.4765	12.0173	3.84691	0.882796	0.104711	-90.1905	29.4744	9.48924	1.81291	3.73231	1.39979	5.75693	44.2518	26.8224	0.426644	Give-up (drowning in progress)	Give-up (drowning in progress)	Give-up (drowning in progress)
6304	-91.2787	29.4204	28.442	10.1924	0.636932	0.181815	-91.2791	29.4203	25.9395	2.43396	5.40119	3.90899	20.5383	33.5698	21.9456	0.213244	Give-up (drowning in progress)	Give-up (drowning in progress)	Give-up (drowning in progress)
33	-90.387	30.2772	17.3943	4.71615	0.753687	0.0140714
39	-90.6852	30.1073	17.7142	4.09754	0.291045	0.000761306
47	-90.5344	30.1339	18.6037	5.42741	0.721717	0.0362299
56	-90.446	30.1255	16.8247	4.01624	0.497972	0.00254962
61	-90.6393	30.2204	15.8735	6.37879	0.636636	0.0417567
63	-90.6408	30.1281	17.2084	7.07694	0.563322	0.0120307
115	-89.9188	29.7807	9.49712	4.81764	0.776735	0.0218305
119	-89.6355	29.4761	14.3893	3.23943	0.781382	0.191782
121	-89.8206	29.6932	14.1641	4.66878	0.819813	0.111583
174	-89.7655	29.3973	14.1241	3.07767	0.875579	0.228259
185	-90.0772	29.7926	16.8476	4.26954	0.832048	0.0394995
188	-90.1348	29.7928	13.3921	4.86314	0.817242	0.0257275
189	-90.2646	29.8088	12.6841	4.95763	0.603406	0.000785532
190	-90.2647	29.5399	13.445	4.25097	0.902871	0.0572094
192	-90.5179	29.8625	13.9196	6.02908	0.772996	0.00944828
206	-90.6667	29.8506	19.005	7.57034	0.62631	0.00428022
211	-90.4629	29.7922	15.5375	5.04833	0.832384	0.0156325
218	-90.6995	29.7687	21.8421	7.7888	0.547019	0.00179201
234	-90.1028	29.7965	16.0206	5.05943	NaN	0.0011363
268	-90.6029	29.7974	16.7103	8.16924	0.623288	0.00306715
278	-90.2278	29.8102	11.0099	4.01526	0.812616	0.0141709
287	-90.0142	29.6857	15.146	3.71662	0.746803	0.0072823
290	-91.0433	29.4797	19.5941	10.3801	0.634052	0.0374783
294	-90.9494	29.4194	0.354152	9.02189	0.580738	0.0318416
296	-90.9022	29.4223	15.7448	6.88402	0.733364	0.0271543
301	-91.2265	29.5064	21.5333	13.6311	0.557647	0.117448
302	-90.913	29.1472	16.7486	4.66778	0.842733	0.279974
312	-90.3853	29.505	16.3756	5.1242	0.738212	0.0368121
327	-91.0682	29.4451	17.7497	7.99067	0.685289	0.0645672
329	-91.1053	29.4798	20.6723	8.72477	0.692094	0.0913826
331	-90.5439	29.5827	12.2878	6.7142	0.755148	0.0243571
355	-90.5405	29.2983	17.1708	3.84616	0.871924	0.227257
365	-91.1986	29.4703	18.2978	9.59712	0.654884	0.152056
367	-90.5724	29.6308	16.0986	5.19811	0.804709	0.0185224
371	-91.0706	29.4273	15.5756	7.7336	0.736372	0.0721059
381	-90.8547	29.4474	15.9732	5.41179	0.534775	0.00111019
382	-90.8542	29.4341	17.9452	5.88162	0.596514	0.00173914
387	-90.321	29.4112	17.2561	4.02416	0.755427	0.115944
394	-90.8551	29.3593	11.7336	3.26106	0.874093	0.0738783
395	-90.8864	29.3606	12.5136	4.11874	0.862267	0.104536
396	-90.8858	29.3427	13.5444	4.11263	0.88079	0.124572
403	-91.1424	29.7571	24.0046	12.3081	0.543779	0.0156415
411	-90.9513	29.4979	19.9184	8.69794	0.594798	0.0215668
414	-90.9434	29.699	11.5785	9.6088	0.247895	0.000844344
463	-91.3233	29.4907	15.6346	7.24161	0.530345	0.174249
465	-91.3845	29.5371	26.685	13.184	0.570004	0.161391
488	-91.5409	29.7073	15.5738	6.8959	0.581826	0.008691
532	-91.9486	29.8251	13.0163	5.55181	0.748662	0.247118
542	-91.6334	29.8049	16.8406	5.86614	0.786442	0.149174
556	-92.7872	29.9153	21.0642	13.1477	0.260538	0.00080825
567	-92.4511	29.9027	27.3138	15.7351	NaN	0.00145415
662	-93.6938	30.035	15.3187	7.4005	0.636762	0.0245815
2627	-89.1852	29.2328	41.3363	5.40105	0.678129	0.162441
2785	-91.0399	29.5033	20.8918	11.694	0.635833	0.0411499
2825	-90.444	29.4978	-16.687	11.4808	0.600932	0.0222701
2862	-91.0773	29.5497	21.2107	13.3686	0.567175	0.031938
2881	-91.012	29.4725	20.7282	9.59048	0.62124	0.0155456
2887	-90.9154	29.5212	16.2363	10.4906	0.64079	0.0197641
2939	-90.5724	29.5946	17.5445	4.89661	0.844779	0.0203289
3166	-90.2891	29.8589	5.308	10.0283	0.553659	0.0263734
3169	-90.2718	29.8889	-1.66374	10.9411	0.45933	0.0215728
4245	-90.1343	29.6728	11.1951	5.72791	0.788688	0.0567944
4355	-89.8234	29.8413	13.5734	4.73622	0.779261	0.0199751
4448	-89.2335	29.2135	28.5548	9.32307	0.595582	0.150034
5003	-91.2892	29.6241	23.736	25.9632	0.435502	0.0937354
5373	-90.6317	30.1015	18.4245	7.4147	0.538441	0.0096717
5452	-90.5303	30.3699	16.1817	5.59522	0.7463	0.0530058
5536	-91.1298	29.9704	22.8281	11.9705	0.512806	0.0092626
5992	-91.541	29.7759	16.058	7.5906	0.745662	0.128097
6008	-91.4805	29.6306	17.6021	15.0495	0.521409	0.110937
6042	-91.3545	29.6369	46.1915	24.9868	0.408205	0.100358
6302	-93.4291	30.0417	18.3843	11.8432	0.451118	0.0498686
